# Supplementary material for: The Bloom syndrome complex senses RPA-coated single-stranded DNA to restart stalled replication forks
Source: PubMed Central journal article supplement (PMC7838300; doi:10.1038/s41467-020-20818-5), 2021-01-26
Supplement: 41467_2020_20818_MOESM1_ESM.pdf [file 41467_2020_20818_MOESM1_ESM.pdf]

BLM

**TR (TOP3A/RMI1-binding domain)**

Human 1 ---MAAMPQNNLQEQLEHRSARTLNNKLSLSKPKFSGFTFKKKTSSDNNVSVT-NVSVAKTPVLRNKDVMNTEDFSFS-  
 Mouse 1 MRI MAAMPQNNLQEQLEHRSARKLNQPSLSKPKSLGFTFKKKTSEG-DVSVT-SVSVKTPALSDKDVNVEAFSFTES  
 Dog 1 ---MAAMPQNNLQEQLEHRSARKLSNKLSPSKPKSSVFTFKKKT SAN-NVSVT-SVSVAKTPVLRNKDVMNTEAFPFSE-  
 Chicken 1 ---MAAMPQNNLREQLRLHSARGALSKVLPARSRPAAFTRRTHSPA-----AGPAALRDKDVMNTEAFSGGVA-  
 Xenopus 1 ---MAAMPQNNLQEQLELFPAGKTSNKLSQLQKTKSSVFTFKKKT CSPN-VSAST-GFIPFQQHVLKDKVMNTEKQDGTHTA-  
 Zebrafish 1 ---MSSLPQNNLKEHLERHNN-AAQNKL SLLKPKPGGFCFKKKTSSSG-ISKVEVPQKVTGSSVLANRSMNTPSNFEVTKN

Human 76 PLPNTTNQQRV---KDFFKNAFAGQETQRG--GSKSLLEDFLQTPKEVCTTQNTPT-VKKSRTALKKEFSSSPDLSL  
 Mouse 79 PLHKPKQQAQI---EGFFKHFPGRQQSKGT--CSEPSLPATVQTAQDTCTTPKTPT-AKKLPVAVFKKEFSSSA---D  
 Dog 75 PLPHATSQQTR---PSDLKNTPAGQQRRRT--VSKPLLEPDL SL-VSRVLCNTQNTPI-VKSSNATFKKEFSSSDSFV  
 Chicken 66 -----RP---KDLR-VGPPG-----ARPALPGFAG-----SSGPT-AGAPPGSV--SVSLFSSGPAAY  
 Xenopus 75 -LPKATERNKI---NCFFT--PVYTKS-----GQPPQVVALKDHVHGNSANK-PPSTEDAASKKTGINISFGSVT  
 Zebrafish 76 PVTFSQKPERVAPKVNFF-TAPSKPKNTVNPLANPFALNKTPLVQSTKALPKSAALPKDSTNDQTVELKHDIS---QL

**1**

Human 150 TINDDWDDMDDFDTSSETSFSVTPPQSHFVRS-STAQKSKKGRNFFKAQLYTTNTVKTDLPFSSSESEQIDLTEEQKDD-  
 Mouse 150 SLSDWADMDDFDMSADA-FASLAKNPATFV-STAQKMAKTKRNFKPPPRKANAVKTDLPSSPECLQVLDLTKESEEEE  
 Dog 148 TINDDWDDMDDFDTS GNSK-LVTPCKNHFVRS-STAQKSKPKRNFKAQLPQANTVKADLPSSFESKQACLTKKQND-  
 Chicken 112 TGDEWDDMDDFDLSGFEEKFSRP-AVLSFKG-P-----RTPQ-----GRGLRVSKARADVGEQEHGSEVSCS-Q-----  
 Xenopus 139 SLEWDDMDDFDTSVSP-----KSHAGKGGKTPQKCNNTS-----PVASFKIQSLEEGPTTEKHDCAKLLYDNN  
 Zebrafish 152 SFNEWDDMDDFETPVKSR-VASPVAGTSTKPK-PSV-SDQNTS-----S-----SCSSKCEETKVNEE-SQA-

Human 228 -----SEWLSSDVICIDDDGPIAEVHINEAQESDS-LKTH-----LEDER-----DN---  
 Mouse 228 EE-----EEEAGADCLSRDVICIDNDSASEELTEKDTQESQS-LKAH-----LGAER-----GD---  
 Dog 225 -----SEWFSNDVICIDDDPNPEELIHGDTPQESH-SLKH-----LEEER-----D---  
 Chicken 173 -----GSSQGLICIDGAGAPAAVLSINGMEEARAAANG-----GSGESQKL-----SN---  
 Xenopus 205 EVASEPRKNLHAKTAESPQSLVCLASVE-P-----IN-----L--ER-----DM---  
 Zebrafish 209 -----TETITAPKDVLSAANGVST-ETAERPEPDSPI-KKSKRPKKSQHTALLSDTEDEEIIHCVSPDTNQK

**2**

Human 269 -----SEKKNLEEAEL-HSTEKVPICI-EFDDDDYDIDFVPPSPPEEII SASSSSSKCLSTLKDLDTSDRKEDVLSTSK  
 Mouse 277 -----SEKKSHEDEAVF-HSVQNTFYF-EHNDNDYDIDFVPPSPPEEII STASSSLKCSMLKDLDDSDKEKGLSTSE  
 Dog 265 -----SEK-KNWEETEL-CSLEKSPCV-ELDEDDYDIDFVPPSPPEEII SASSSSLKCFMMLKDLASGT-EDGPSTSE  
 Chicken 218 -----GKSSQLEPGDV--GNELLADI-ELLEDDY-IDVPPSPPEEELPSFSPSVNVSIFKESPTDGRSAVHGTE-  
 Xenopus 242 -----CRNTDYLGTDDLEHDQETLSQVLIIEEDDCEFDIIPPSPSDESLSSPPVLKVIISAQRKHKS-----SLT  
 Zebrafish 275 NFKSVAVAEK-DKWGEPN--VIDSDDCE-ENNHYEGFEDFIIPPSPPIPEEISLSVSDKEKSSSEPVTPANKKESRSAS-

**DHBN (dimerization domain)**

Human 340 DLLSKPEKMSMQELNP--ETSTDCDARQI-SLQQQLIHVMTHICKLVDITPDDKLLKLLDCNELLQQRNTRRKLLETVDF  
 Mouse 348 ELISKPEEMTTHKSDA--GTSKDCDAQI-RIQQQLIHVMTHICKLVDITPDELEALNCGTELLQQRNTRRKLLEAEAGF  
 Dog 333 D-LPTPKGTTQQPNO--ETSTNCDARQP-SLQQQLIHVMTHICKLVDITPDELKALTCGNALHQQRDTRRKLLEAADF  
 Chicken 286 ---SEPELMAKQPAEQDSSAEHADKGL-HLEQQLYSVMTHICKLVDITPHELTSISCKELLLQQRERLRRKLLEADSGA  
 Xenopus 307 D-VNDCENTTDHLQGO--SVSTSLDS---KVPSQLLTMLEICDLVDKIPISELHVLSCGLDLKKKRDTRRKLLENSDSV  
 Zebrafish 349 G-LPAEL-----DQSAKGLKGADDALFVMSICCLVDITPEHELIALTCGTELLLQRAHRKRILAKGGS

Human 417 -NKSDASLLGSLWR---YRPDSL-----DGPM-----EGDSCPTGNSMKE-----  
 Mouse 425 -NGNDVRLGSLWR---HRPDSL-----DNTV-----QGDSCPVGHPNKE-----  
 Dog 409 -NTSDASVLASVWT---RGPDSL-----GSPVEDMASLSAPDVFPKGNSHPTGNSVKE-----  
 Chicken 362 LNTNSVNG-PRNWKACVQQDPSSRPGTPLCSGPG-----RGV-SSVGSTPKS-----  
 Xenopus 380 FRSSPADS-----STV-----SLTSCSTSTQNRDFNVNAPKGAESLSGSSVSKV  
 Zebrafish 413 -SRTSHS-----DSVSTPGFLNR-----

Human 453 LNFSPHPSNSVSPGD-----CLLTTTL-----GKTGFSATR--KNLFEERPLFN-----THLQK-----  
 Mouse 461 LNSPYLHSHSPSTEE-----CLPTTTP-----GKTGFSATP--KNLFEERPLN-----SHLQK-----  
 Dog 458 LNFPHLHSHSSSTGE-----CLLATTP-----GKTGFSATM--KNPSEIRLLFS-----PHLQK-----  
 Chicken 407 TNLPSVLS-----RTV-----NSSSSFSTIR--NQTLDKL--DTSYSSKETDQEVICLEPAALPSP  
 Xenopus 424 FKFNKLAVHDIGTKESENSANSAPNFMKIG----NKTSSFSFRAGGDSIMEN-SFN-----FHS-----  
 Zebrafish 430 PTFGVTPSNL---T-----SLTPVTSKREGVKTGFSFRK--S-IASVM--SVGD--ESVFED-----

**BLM**

Human 499 -----S FVSSNWAET-----PRL-----  
 Mouse 507 -----S FVSSNWAET-----PRM-----  
 Dog 504 -----S FVSSNWAET-----PRI-----  
 Chicken 458 KVNGKGSTLSRPSSEASFNQSWCEK-----PT-----  
 Xenopus 478 -----S VLSNSRFNT-----PQN-----  
 Zebrafish 478 -----S DCIINGVETPGGTWNPNSSTKI SAGRDTFNQSIQTLSKPEKSTDKCYSRSLSFNESSNQTDLFYS

3

Human 512 -----GKKNESSYFPGNVLSTAVK DQNKHTA--SINDLERETQPSMDIDNFDIDDFDD--DDWEDIMHNLAASKSS  
 Mouse 520 -----ENRNESTDFPGSVLSTTVK AQSQA--SGWNVERHGQASMDIDNFDIDDFDDDDDDDDWENIMHNFPASKSS  
 Dog 517 -----EKRNESSYFLGNVLTSTAVR DQNKRAA--PINDLE--IQAACDIDNFDIDGDFDD--DDWEDIMHDLAASRSS  
 Chicken 485 -----GRDSGNWRVPERPTASTALKAQHTAPAGNPASGCWDVNDTDFDIDHFDIDDFDE-----GWE EAVAPEAAPEAP  
 Xenopus 491 -----EKP-----ISSSTCTRP---YSQ--PIDDM-NPDLDFDIDNFDIIDLDDI---HCLD SP-AAPSVSSKN  
 Zebrafish 543 PKRVDSGSRNADSSVEINL IAGSSSLRT---GAE--PVD-----DIDLDDFDIDDFDENIPDYVEEPPSVLESRNN

Helicase

Human 581 -TAAYQPIKEGRPIKVSERLSSAKTDCLEVS-STAQNINFSESIQNYTDKSAQNLASRNLKHERFQSLSFPHTKEMMKI  
 Mouse 592 -TATYPPIKEGGPVKLSERISSAKAKFLFVV-STAQNTNLSESIQNCSDKLAQNLSKPKHEHFQSLNFPHTKEMMKI  
 Dog 584 -TAACLPIKEGRPVKVSERISSAKTNCLFVA-STAQKN-SESIQNYTDKSAQNLASRNLKHERFQSLSFPHTKEMMKI  
 Chicken 554 PAPQWQPLREGSA--SLRCRLLAAAAGSAGGPHPTAPKSG-----CGISAKSSSEPLVNP AHERFRGMKFSHSEEMTKI  
 Xenopus 546 -VPQYPTIREAQLDSRNKEKNTNRN-----NTGDTN-----PSLLSDSLLKQIENPAHERFRGFNFPHSKEMMKI  
 Zebrafish 610 -GVKTPSVEEGGSSKSFERKTF-----TFEAP-KSIK-----TPNPEPLYRNP AHRFRGFNFPHSPPEMKI

Helicase

Human 659 FHKKFGLNHFRFNQLEA INAALLGEDCFILMPTGGGKSLCYQLPACVSEGVTIVISPLRSLIVDQVQKLTSLDIPATYLT  
 Mouse 670 FHKKFGLNHFRFNQLEA INAALLGEDCFILMPTGGGKSLCYQLPACVSEGVTIVISPLRSLIVDQVQKLTSLDIPATYLT  
 Dog 661 FHKKFGLNHFRFNQLEA INAALLGEDCFILMPTGGGKSLCYQLPACVSEGVTIVISPLRSLIVDQVQKLTSLDIPATYLT  
 Chicken 627 FHKKFGLNHFRFNQLEA INAALLGEDCFILMPTGGGKSLCYQLPACVSEGVTIVISPLRSLIVDQVQKLTSLDIPATYLT  
 Xenopus 611 FHKKFGLNHFRFNQLEA INACLGGEDCFILMPTGGGKSLCYQLPACVSEGVTIVISPLRSLIVDQVQKLTSLDIPATYLT  
 Zebrafish 670 FHKKFGLNHFRFNQLEA INASLLGEDCFILMPTGGGKSLCYQLPACVSEGVTIVISPLRSLIVDQVQKLTSLDIPATYLT

Helicase

Human 739 GDKTDEAATNIYQLSKKDPIIKLLYVTPEKICASNRLSTLENLYERKLLARFVIDEAHCVSQWGHDFRDYKRMNMLR  
 Mouse 750 GDKTDEAANIYQLSKKDPIIKLLYVTPEKVCASNRLSTLENLYERKLLARFVIDEAHCVSQWGHDFRDYKRMNMLR  
 Dog 741 GDKTDEATSIIYQLSKKDPIIKLLYVTPEKVCASNRLSTLENLYERKLLARFVIDEAHCVSQWGHDFRDYKRMNMLR  
 Chicken 707 GDI TDAASKTYMQLSKKDPIIKLLYVTPEKVCASNRLSALENLYNRKLLARFVIDEAHCVSQWGHDFRDYKRLNMLR  
 Xenopus 691 GDKTDEAASIIYQLSKKDPIIKLLYVTPEKVCASRLSTLENLYERKLLARFVIDEAHCVSQWGHDFRDYKRLNMLR  
 Zebrafish 750 GDKTDEAARIYQLSKKDPIIKLLYATPEKVCASGRMISALONLYERKLLARLVIDEAHCVSQWGHDFRDYKRLHEL

Helicase

Human 819 QKFPSVPMALTATANPRVQKDILTQLKILRPQVFSMSFNRHNLKYVLPKKPKKVAFDCEWIRKHHHPYDSGIYCLSR  
 Mouse 830 QKFPSVPMALTATANPRVQKDILTQLKILRPQVFSMSFNRHNLKYVLPKKPKKVAFDCEWIRKHHHPYDSGIYCLSR  
 Dog 821 QKFPSVPMALTATANPRVQKDILTQLKILRPQVFSMSFNRHNLKYVLPKKPKKVAFDCEWIRKHHHPYDSGIYCLSR  
 Chicken 787 KKFHSPVPMALTATANPRVQKDIQNQLEMLKQVFSMSFNRHNLKYVLPKKPKKVAFDCEWIRKHHHPYDSGIYCLSR  
 Xenopus 771 QKFQSPVPMALTATANPRVQKDIINQLKILRPQVFSMSFNRDNLKYVLPKKPKKVAFDCEWIRKHHHPYDSGIYCLSR  
 Zebrafish 830 RMFPNVPMALTATATPRVQKDIINQLKILRPQVFSMSFNRNNLKYVLPKKPKKVAFDCEWIRKHHHPYDSGIYCLSR

Helicase

Human 899 RECDTADTLQRDGLAALAYHAGLSDSARDEVQKWINQDGCQVICATIAFGMGIDKPDVRFVIHASLPKSEGGYYQESG  
 Mouse 910 RECDTADTLQREGLAALAYHAGLSDSARDEVQHKWINQDNCQVICATIAFGMGIDKPDVRFVIHASLPKSEGGYYQESG  
 Dog 901 RECDTADTLQKDGGLAALAYHAGLSDSARDEVQHKWINQDGCQVICATIAFGMGIDKPDVRFVIHASLPKSEGGYYQESG  
 Chicken 867 HECDTAAAILQKEGLAALAYHAGLSDSNRDLVQKWINQDGCQVICATIAFGMGIDKPDVRFVIHASLPKSEGGYYQESG  
 Xenopus 851 HECDTADTLQKEGLAALAYHAGLSDSNRDYVQHKWINQDGCQVICATIAFGMGIDKPDVRFVIHASLPKSEGGYYQESG  
 Zebrafish 910 NDCDTADSLQRAAGLAALAYHAGLSDSDREYVQNKWINQDGCQVICATIAFGMGIDKPDVRFVIHASLPKSEGGYYQESG

Helicase

RQC

Human 979 RAGRDEISHCLLFYIYHDVTRLKRLIMMEKDGNIHTRETHFNNLYSMVHYCENITECRRIQLLAYFGENGFPNDFCKKH  
 Mouse 990 RAGRDEISHCVLFYIYHDVTRLKRLIMMEKDGNYHTRETHVNNLYSMVHYCENITECRRIQLLAYFGEKGFNDFCKKY  
 Dog 981 RAGRDEISHCLLFYIYHDVTRLKRLIMMEKDGNRHTRETHFNNLYSMVHYCENITECRRIQLLAYFGESGFNDFCKKY  
 Chicken 947 RAGRDEISHCLLFYSYSDVTRLRLRLIMMEKDGNSHTRETHFNNLYSMVHYCENNVDCRRIQLLAYFGETDFNDFCKDH  
 Xenopus 931 RAGRDEISHCLLFYSYHDVTRIRRLIQMEKDGNSHTRETHFNNLYSMVHYCENNVVECRRIQLLSYFGENNFNDFCKEH  
 Zebrafish 990 RAGRDEISHCVLFYSYSDVTRIKRLIAMMEKDGNIHTRETHFNNLYSMVHYCENVAECRRIQLLAYFGEHTFNDFCKEH

BLM

RQC

|           |      |                                                                                   |
|-----------|------|-----------------------------------------------------------------------------------|
| Human     | 1059 | PDVSCDNCCKTKDYKTRDVTDDVKSIIRFVQEHSSSQGMRNIKHVGPSGRFTMNMLVDIFLGSKSAKIQSGIFGKGSAYS  |
| Mouse     | 1070 | PDVSCDNCCKTKDYKTRDVTDDVKNIIRFVQEHSSSPGTRNI---GPAGRETNMLVDIFLGSKSAKIKSGIFGKGTYS    |
| Dog       | 1061 | PDVSCDNCCKTKDYKTRDVTDDVKNIIRFVQEHSSSQGTRIKNQLGPSGRFTMNMLVDIFLGSKSAKIQSGIFGQGSTYS  |
| Chicken   | 1027 | PEVICDNCGRKKDYKSRNVTDVVKSIIRFVQHQCGQVGGINGNRNTGSGRYTINMMVDIFLGAKSAKIQSGIFGKGAAYS  |
| Xenopus   | 1011 | TQVACDNCGLGKKNYKSRDVTDDVGNIRFVQDNCSLVQGRGKGR-SNNTRLTINMMVDIFLGSKSAKIQSGIFGKGAAYS  |
| Zebrafish | 1070 | PEVICDNCARPKNKYKSRNVTDVVKTIIRFVQDNCSEKVNRYGKS-AQQNRLTINMLVDIFLGSKSAKIQSGIFGVGAAYS |

RQC

HRDC

|           |      |                                                                                    |
|-----------|------|------------------------------------------------------------------------------------|
| Human     | 1139 | RHNAERLFRKKLILDKILDEDLYINANDQAIAYVMLGNKAQTVLNGNLKVFEMETENSSSVKQKAL-VAKV SQREEMVKK  |
| Mouse     | 1147 | RHNAERLFRKKLILDKILDEDLYINANDQPIAYVMLGTRKAHSVLSGHLKVFEMETENSSSIKQKAL-VAKV SQREEVVKK |
| Dog       | 1141 | RHNAERLFRKKLILDKILDEDLYINANDQPIAYVMPGNKAQTVLNGHLKVFEMETENSTSIKQKAALVAKV SQREEVVKK  |
| Chicken   | 1107 | RHNVERLFRKKLVLDRITLDELYITFNDQAVAYVVLGEKAQAVLNGLLQVFEHETENASAIKORAS-VTKMSQREEMVKK   |
| Xenopus   | 1090 | RHNAERLFRKKLVLDRITLDELYITFNDQAVAYVKMGEKAQAVLNGFLKVFQTESASSIKQKASVVTNTSQREEMVKK     |
| Zebrafish | 1149 | KHNAERLFRKKLVLDRITLDELYITNSGQAVAYISAGPKAMSVLNGCMQVFEHETENASSIKHRASVCEKMSKREEMVKK   |

HRDC

|           |      |                                                                                   |
|-----------|------|-----------------------------------------------------------------------------------|
| Human     | 1218 | CLGELTEVCKSLGKIFGVHYFNIFNTVTLKKLAESLSDPEVLLQIDGVTEDKLEKYGAEMISVLQKYSEWTSVPAEDSSP  |
| Mouse     | 1226 | CLGELTEVCKLLGKIFGVHYFNIFNTATLKKLAESLSDPEVLLQIDGVTEDKLEKYGAEMIPVLQKYSEWTVPAEDGSP   |
| Dog       | 1221 | CLGELTEVCKSLGKIFGVHYFNIFNTVTLKKLAESLSDPEVLLQIDGVTEDKLEKYGAEMIPILQKYSEWTLPAEDGSP   |
| Chicken   | 1186 | CLGELTEVCKTLGKIFGVHYFNIFSTVTLKKLAETLSDAPEVLLQIDGVTEDKLEKYGAEMIKVMDKYSEWTPEDAACQ   |
| Xenopus   | 1170 | QVLELTELCKRLGKIFGVHYFNIFNTATLRRIAESLSDPEVLLQIDGVTEDKLDKYGAEMIDVLQKYSEWTLPEVICQ    |
| Zebrafish | 1229 | CLGELNDLCKKLGKIFGVHYFNIFSTATLKKLAETLSADPEVLLQIDGVTEDKLEKYGAEMIEILLQKYSEWQLPAEAQAE |

NLS

|           |      |                                                                                 |
|-----------|------|---------------------------------------------------------------------------------|
| Human     | 1298 | GISLSS-SRGPGRSAAE---ELDE-EIPVSSHVFASKTRNERKRRKMPASQSKRRKTASSG--SKAKGGSAT-CRKLSS |
| Mouse     | 1306 | G-----ARGAPE-DTE---EEEE-EAPVSSHVFANQTRNERKRRKMSATHKPKRRRTSYGG--FRAKGGSTT-CRKTSS |
| Dog       | 1301 | RISPS-SRSTRRSAPD---EFDE-ETSVSSHVFANKTKNERKRRKMSATHKPKRRRTGFGG--SKTKGGSAT-CRKTSS |
| Chicken   | 1266 | SVDTAPGSAGTP--GSE---EAAA-DDVVTSSYFGGANQRKRRKRLPNSGESKRRKTSSGG--SQQFYSKGA-RYRRAR |
| Xenopus   | 1250 | KSGGPA-NVSARR-SNS---DHDD-ESCDKSSYFSSNNKKGPKRKNSSYFGKSKRRKTGGDQQSRSKNINSSYARKNST |
| Zebrafish | 1309 | SSGWIDTRGHQN-DEDDNDDEGGGVSTYFRSNSGRGAKRQGSYRKPRRKGGSSQ--NSSAKGQYSS-NWSSSR       |

4

|           |      |                                                          |
|-----------|------|----------------------------------------------------------|
| Human     | 1370 | K-TKSS-SIIIGSSSAS-HTSQ-ATS-GANSKLGIMAPPKPI--NRPFLKPSYAFS |
| Mouse     | 1372 | K-SKFY-GVTGSRAS-CASQ-ATS-SASRKLGIMAPPKPIV--NRTFLRPSYAFS  |
| Dog       | 1373 | K-SKSS-NIFGPHSSL-HGSQ-AAS-GAARKLGIMAPPKPI--NRPFLKPSYAFS  |
| Chicken   | 1337 | R-----APGSRAAAPQSS-ALR-GAGARLGIMAPPKPS--SRHFLQPSYAVL     |
| Xenopus   | 1324 | A--K-----TSSS-YISG-SKT-GADKRPGFMAPPMPO-PNRRFLKPSYSMF     |
| Zebrafish | 1386 | GGGKGGGYRGGSRGAG-RGSRSAPSGSAAKRPGFMSLPTEQAAARPFLKPSYSHL  |

RM11

3H

OB1

Human 1 MNVT-SALRAETWLLAAWHVKVPPMWLEACINWIQEENNNVNLSQAQINKQVFEQWLLTDLRDLEHPLLPDGLILEIPKG  
 Mouse 1 MSVA-SAVLRVETWLLATWHVKVPPMWLEACVNWIQEENNATLSQAQINKQVLEQWLLTDLRDLEHPLLPDILELIPKG  
 Dog 1 MNVT-NALRVETWLLATWHVKVPLTWLEACVNWIQEENDNVNLSQAQINKQVFEQWLLTDLRDLEHPLLPDGLILEVPGK  
 Chicken 1 MSTP-NVARTVETWLLSSTWHVKVPLTWLEACINWIQEENGGNLSQAQINKQVFEQWLLTDLRDLEHPLLPDGLILDAPKG  
 Xenopus 1 MMATSGTANRVKTWLLISTWHVKVPPDWLEACINWIQEENG-SSLLQAEINKQVFEQWLLTDLRDLEFPVLPANITDSLKC  
 Zebrafish 1 MSVG-EVQ-VIQAWLRSEWHIQVPPAWLLACVNWIKKEADRASIPQSQINKQVLEQWLLTDLRDLAHPVLPRISEAQKT

OB1

Human 80 EINGFYAQLQINSLVDVSPAYSQIQKLRGKNTTNDLVIAEAQVTPKPWEAKPSRMLMLQLTDGIVQIQGMEYQPIPIILHS  
 Mouse 80 EINGFYAQLQINSLVDVSPAYSQIQKLRGKNTTNDLVIAETQSTPKPWEVFPSPRMLMLQLTDGIVTHIQGMEYQSIIPALHS  
 Dog 80 ELTGFYALQINSLVDVSPAYSQIQKLRGKNTTNDLITAEATQVTPKPWEAKPSRMLMLQLTDGIVQIQGMEYQSIIPVLHS  
 Chicken 80 ELSGFYSLQIDSLLDVSPAYSQIQKLRGKSTVNEEVIANQAFQKPWEAKPTRMLMLQLTDGIVHQIQGMEYQFVPIVLS  
 Xenopus 80 EINGFHAVQMDSLVDLSTIPAYSQIQKLRGKDSITNEQVCTTQSQKPWEAKPTRMLMLQLTDGTQHIQAMEYRPIQAINA  
 Zebrafish 79 VLSNRCCVQMDSLLDVSPAYNQLQRIRGTDCSNDQVSAVTOETQRPWEAKPTRMLMLQLTDGIVQNLGMEYRPIIPALNA

OB1

Human 160 DLPPGTKLILTYGNISFRLGVLLKPNVVKLGGEVDALIEEYAEKVLARLIGEPDLVSVIPNNSNENIPRVTDVLDPA  
 Mouse 160 GLPPGTKLIVRGCILFRGLVLLKPNVVKLGGEVDGLSEENAQEKVLARLIGELDPTVPVIPNNSIHNVPKVSGLDAV  
 Dog 160 DLPPGTKLILTYGNISFRLGVLLKPNVVKLGGEVDALIEEYAEKVLARLIGEPDPIVSVIPNPNQSIGITDVLDP  
 Chicken 160 NLPPGTKLIVHGNVAYRGLVLLKPNVVKLGGEVDALIEEYSQERVLARLIGEAENPDSVRQPGHEQIVPGVDELGQT  
 Xenopus 160 NLSPPGTKMVLQGTIVCRGLVLLKPNVVKLGGEVEALNAEYTOTKVLARLIGVEDNTVAQHSNVQEAHAGVAAGELGQA  
 Zebrafish 159 NLPPGTKLQIVGPIAVRGLVLLKAEINKVGLGGEVEQLIEIHSQSRVLCGTGLPEETH-----

5

Human 240 LGPSDEELLASLDENDELNTSSR-CFTTGSSSN-----TIPTRQSSFE-----  
 Mouse 240 LGPSDEELLASLDESEESAANNVAMRSCFSTGTSSN-----TPTNPSGFE-----  
 Dog 240 LGPSDEELLASLDENE-FAAINDTSLDRRFFSTDSSSN-----TITRQSSFE-----  
 Chicken 240 LGPSDEELLASLDENNDFILNNETSLSGYCSRSNNFSAATSCSLTYNENTTGFPLQ-----  
 Xenopus 240 LGPSDEELLASLENEEFINSNGVPSISGYYSRNENSS-----ISSSTQHQTQDSIVRCWVDDDDILEFSINNGVPS  
 Zebrafish 223 PQQEPGLVASVADSGYSSLASEASLRH-----PQ-----SQPLPQISRQ-----

6

Human 287 -----PEFVISPSPKLEPSNLS-----IHVMDGELDDFSLLEFALLLEETVQKEQMETKELQPIITFNR  
 Mouse 288 -----PGCNISSRPKLEKPPNQP-----THFTDGEFDDFSLLEFALLLEETVQKEQMETKASQPLTLKE  
 Dog 287 -----EQRIISPSPKLEKPPDPS-----MCFTDGEELDDFSLLEFALLLEETVQKEQMETTELQPLTLNR  
 Chicken 297 -----QESVNLPRSDIQT-PS-----VEYNDAFLNDFLEDDILLEETVQRELEEV----SVARNG  
 Xenopus 313 GYYSRNENSSISSSTQHQTQDSIVRQTSFPMLDQTVVHVNVANNHAIIEEQDIDDELFLLEETVQRELEEMSMSQAEV---  
 Zebrafish 258 -----DDWDMDEIPDIDFRSIP-----DHFDLPLQNNNPLEDVPEDFDIDIP--LDEL--NVMCPI

Human 344 NADRSI-----ERFSHPNPTNNFSLTC--KNGNNWSEKN-----VSEQM  
 Mouse 345 NTGKCM-----EIFSHKPSLNHTALIH--KQGNFDEKT-----SEQM  
 Dog 344 TPDESIEIVSQMETEELQPLTLNRPDESTIERVSHKPNLTGNFSLTC--KSRNNWNKKN-----LSEQM  
 Chicken 351 NVNLST-----ERIPHTYRSCGSSLNETSEKDDGCGSEKPEVETSKQKNLARTVSTGDG  
 Xenopus 390 -----  
 Zebrafish 310 DVEVSA-----GTLEDPERNKHDSS-----

Human 383 TNEKDSFGCPSVRDQNRSIFSVHCNVPLAHDFTNKEKNLETDNKIKQT-SSSDSHSLNNKIL--NREVVNYVQKRNLSQIS  
 Mouse 383 IHEDKFFDCASTRNHHR-F-----SAHDFTNDSKISEVDDAAQQTLSNNVHCLRNKIL--NRKLD--LSEKSSQIS  
 Dog 408 INEGSFCSPSAGDQNSVFSVHNNVPLPHDFTNK--DSETDNKIKQTFSSIDGHSNNKISISNGELVNYVPKSSSHIS  
 Chicken 406 TSTGGSLLQCNSVSQACSSAIVLLK---NPHEERN--DLGPDESSCQSRHAPDSRQLNKD-----PVSSSKTD  
 Xenopus 390 -----THGS  
 Zebrafish 330 -----LLNGSKPEEVS-----FPSRSRLIGNT-----YQSRTLN

OB2

Human 460 NENDCNLQSCSLRSEENSINLSIAMDIYSPPEFVYLSVLMNA--SKPKETITVVKAFIVTLTGNLSSSGGIWSTAKVSDG  
 Mouse 451 KENGHPFQACSSRSFENNTYLSIGMDLHSPPEFIYLSVLMNA--SKPKETITVVKAFIVTLTGNLSSSGGFVGTAKVSDG  
 Dog 486 NENDHLLQTCSSRSSEYSTPLSSAMDIYSPPEFIYLSVLMNA--SRPKETITVVKAFIVTLTGNLSSSGGIWSTAKISDG  
 Chicken 469 PEADQQAILCR-P-----GNACDLIDSPPEFTYLSLILNA--KPKETITLVKVKCFIVTLTGNLSSNGSWGAKAVSDG  
 Xenopus 394 TDLPTTSLATS--HASSAS-CTSDQNNIDIPPYTYLSTILNA--SKSRSTITVVKLKSFIVTLTGNLSSHSCGLWNTAKAKISDG  
 Zebrafish 358 KVPNTSLASCSTST-----LDSSACKETP-MYLCSLQAGCWPEKSPQVFRLOAFIVTLTGNLRISSGGVWKGATISDG

**RM11**

**OB2**

|           |     |                                                                                    |
|-----------|-----|------------------------------------------------------------------------------------|
| Human     | 538 | TAYLDVDFVDEILTSLIGFSVPPEMKQSEKDPDLQYQKFLRGLQKCQRDLIDICCLMTISNFSLSKAMVLAIQDVMNEHLE  |
| Mouse     | 529 | TAYLDVDFIDEILTSWIGYVPEMKQLKDPDKYKTFLEGLQKCQRDLIDICCLMTISNDFSSCKGVVLEIQDVMGMEHVE    |
| Dog       | 563 | TAYLDVDFADEILTSLIGFSVPPEMKQSEKDPDLQYQKFLRGLQKCQRDLIDICCLMTISNFSLSKAMVLAIQDVMKTEHLE |
| Chicken   | 540 | SAYLDVDFADDILTSLIGFSVPPEMHTLEKDPALQPKLKGLEERCQKQLIDICCLMTIEENFFQSKATVLIQDVTDARHLE  |
| Xenopus   | 470 | TGYLNVDFESDDVLTSLIGFTVPEMKTLKDPSSQQSTLMRGLQKCQRMLIDFCGVMTVSNFAKEEAVVLSIQDVTTEEIMQ  |
| Zebrafish | 430 | SGYLDVDLSDNMLSELIGFSAAEITRVLEKDLARRGEVDSGTQHCQRELVDMCCMMSVQVDLT-GRGVVLSASFTSDRECS  |

**OB2**

|           |     |             |
|-----------|-----|-------------|
| Human     | 618 | NLKKRLN---K |
| Mouse     | 609 | NLKKRLN---K |
| Dog       | 643 | NLKKRLN---K |
| Chicken   | 620 | QLKKRLN---K |
| Xenopus   | 550 | SLQKTLR---S |
| Zebrafish | 509 | EMQKRVKEARR |

RM12

OB3

|           |   |         |                 |           |              |     |   |   |   |   |   |   |   |   |   |   |   |   |   |     |     |   |   |   |   |   |   |   |   |   |   |   |   |   |   |   |   |   |   |   |   |   |   |   |   |   |   |   |   |   |   |   |   |   |   |
|-----------|---|---------|-----------------|-----------|--------------|-----|---|---|---|---|---|---|---|---|---|---|---|---|---|-----|-----|---|---|---|---|---|---|---|---|---|---|---|---|---|---|---|---|---|---|---|---|---|---|---|---|---|---|---|---|---|---|---|---|---|---|
| Human     | 1 | MAAA    | DS-FS           | -----     | GGPAGVRLPR   | S   | P | L | K | V | L | A | E | Q | L | R | R | D | A | E   | --- | G | P | C | A | W | R | L | S | - | R | A | A | A | G | R | C | P | L | D | L | A | A | V | W | M | Q | G | R | V |   |   |   |   |   |
| Mouse     | 1 | MAAA    | SESLS           | -----     | SGGPGAVRLPRL | P   | P | L | K | V | L | A | G | Q | L | R | R | H | A | E   | --- | G | P | C | A | W | R | L | S | - | R | A | A | V | G | R | A | P | L | E | I | V | A | V | W | M | Q | G | T | V |   |   |   |   |   |
| Dog       | 1 | MAAA    | AP-VGAAGSVAGGGG | FPVAVRLPR | S            | P   | L | K | V | L | A | E | Q | L | R | R | D | A | E | --- | G   | P | C | A | W | R | L | S | - | R | A | A | T | G | R | C | P | L | E | L | V | T | V | W | M | Q | G | T | V |   |   |   |   |   |   |
| Chicken   | 1 | MAGEA   | -----           | -----     | AS           | P   | L | K | V | L | A | A | Q | L | R | A | A | G | R | --- | G   | A | G | T | W | R | L | S | - | R | T | E | T | G | R | A | P | L | C | I | R | A | V | W | M | Q | G | T | V |   |   |   |   |   |   |
| Xenopus   | 1 | MATR    | ET-SA           | -----     | SGG          | --- | F | Q | F | S | P | P | M | K | L | A | G | K | L | R   | E   | C | T | K | R | S | - | G | A | T | P | S | F | W | L | E | W | - | G | P | S | G | G | P | L | D | V | S | L | V | L | Q | G | N | L |
| Zebrafish | 1 | MMCASFL | -SA             | -----     | DRARS        | P   | P | M | K | V | L | S | S | Q | L | R | E | A | S | E   | S   | Q | S | S | G | K | E | V | V | - | R | R | L | G | A | S | G | R | R | S | L | Q | V | S | V | W | M | Q | G | T | V |   |   |   |   |

OB3

|           |    |     |     |   |   |   |   |   |   |   |   |   |   |   |   |   |   |   |   |   |   |   |   |   |   |   |   |   |   |   |   |   |   |   |   |   |   |   |   |   |   |   |   |   |   |   |   |   |   |   |   |   |   |   |   |   |   |   |   |   |   |   |   |   |   |   |   |   |   |   |   |   |   |   |   |   |   |   |   |
|-----------|----|-----|-----|---|---|---|---|---|---|---|---|---|---|---|---|---|---|---|---|---|---|---|---|---|---|---|---|---|---|---|---|---|---|---|---|---|---|---|---|---|---|---|---|---|---|---|---|---|---|---|---|---|---|---|---|---|---|---|---|---|---|---|---|---|---|---|---|---|---|---|---|---|---|---|---|---|---|---|---|
| Human     | 66 | MAD | --- | R | G | E | A | R | L | R | D | P | S | G | D | F | S | V | R | G | L | E | R | V | P | R | G | P | C | L | I | V | P | G | K | Y | V | M | V | M | G | V | V | Q | A | C | S | P | E | E | C | L | O | A | V | K | M | T | D | L | S | D | N | - | P | H | E | S | M | W | E | L | E | V | E | D |   |   |   |
| Mouse     | 68 | AAE | --- | G | Q | A | R | L | R | D | S | S | G | A | F | S | V | R | G | L | E | R | V | P | R | G | P | C | L | L | P | G | K | Y | V | M | V | M | G | V | V | Q | A | C | S | P | E | E | C | L | O | A | V | K | M | T | D | L | S | D | N | - | P | M | H | E | S | M | W | E | L | E | V | E | D |   |   |   |   |
| Dog       | 75 | TAG | --- | G | G | E | A | R | L | R | D | P | S | G | A | F | S | V | R | G | L | E | R | V | P | R | G | P | C | L | I | V | P | G | K | Y | V | M | V | M | G | V | V | Q | V | C | S | P | E | E | C | L | O | A | V | K | M | T | D | L | S | D | N | - | P | M | H | E | N | M | W | E | L | E | V | E | D |   |   |
| Chicken   | 53 | Q   | V   | E | R | G | G | G | S | A | R | L | R | D | G | S | G | H | F | T | V | L | G | V | E | D | V | P | R | G | P | C | L | S | A | G | K | Y | V | M | V | M | G | V | V | R | A | C | S | P | E | P | V | L | R | A | T | K | M | T | D | L | S | E | N | - | P | M | H | E | E | M | W | G | L | E | V | E | E |
| Xenopus   | 66 | Q   | V   | R | P | D | R | G | T | T | L | R | L | D | D | T | H | T | F | V | C | G | A | D | K | V | P | K | G | P | C | L | E | I | G | K | Y | V | M | V | M | G | V | V | L | S | S | P | E | E | I | L | R | A | V | K | I | T | D | L | S | D | N | - | P | M | H | S | L | M | W | K | T | E | V | H |   |   |   |
| Zebrafish | 65 | E   | L   | Q | A | D | - | N | N | T | L | L | L | D | E | T | G | N | F | T | V | N | G | I | N | S | V | P | R | G | P | C | L | S | P | G | K | Y | V | M | V | M | G | V | V | Q | S | H | S | P | E | P | V | L | R | A | V | K | M | A | D | L | S | A | N | A | A | H | R | R | N | W | I | E | V | E | D |   |   |

OB3

|           |     |   |   |   |   |   |   |   |   |
|-----------|-----|---|---|---|---|---|---|---|---|
| Human     | 142 | L | H | R | N | I | - | - | P |
| Mouse     | 144 | L | H | R | N | I | - | - | P |
| Dog       | 151 | L | H | R | I | I | - | - | P |
| Chicken   | 132 | L | H | R | V | I | - | - | P |
| Xenopus   | 145 | L | H | R | N | I | L | R | P |
| Zebrafish | 144 | L | Q | R | V | I | - | - | P |



TOP3A

|           |   | TOPRIM |   |   |   |   |   |     |     |     |     |   |   |   |   |   |   |   |   |   |   |   |   |   |   |   |   |   |   |   |   |   |   |   |   |   |   |   |   |   |   |   |   |   |   |   |   |   |   |   |   |   |   |   |   |   |   |   |   |   |   |   |   |   |   |   |   |   |   |   |   |   |   |   |   |   |   |   |
|-----------|---|--------|---|---|---|---|---|-----|-----|-----|-----|---|---|---|---|---|---|---|---|---|---|---|---|---|---|---|---|---|---|---|---|---|---|---|---|---|---|---|---|---|---|---|---|---|---|---|---|---|---|---|---|---|---|---|---|---|---|---|---|---|---|---|---|---|---|---|---|---|---|---|---|---|---|---|---|---|---|---|
| Human     | 1 | M      | I | F | P | V | A | R   | Y   | A   | --- | L | R | W | L | R | R | P | - | E | D | R | A | F | S | - | R | A | A | M | E | M | A | L | R | - | G | V | R | K | V | L | C | V | A | E | K | N | D | A | A | K | G | I | A | D | L | L | S | N | G | R | M | R | R | E | G | L | S | K | F | N | K | I | Y | E | F | D |
| Mouse     | 1 | M      | I | F | P | V | T | L   | L   | A   | --- | F | Q | W | H | R | R | P | - | G | G | R | A | L | S | - | R | A | A | M | E | V | A | F | R | - | G | V | R | K | V | L | C | V | A | E | K | N | D | A | A | K | G | I | A | D | L | L | S | N | G | R | M | R | R | E | G | L | S | K | F | N | K | I | Y | E | F | D |
| Dog       | 1 | M      | I | F | P | V | A | R   | S   | A   | --- | L | R | W | L | R | P | - | G | A | R | T | L | S | - | R | A | A | M | E | V | A | F | R | - | G | V | R | K | V | L | C | V | A | E | K | N | D | A | A | K | G | I | A | D | L | L | S | N | G | R | M | R | R | E | G | L | S | K | F | N | K | I | Y | E | F | D |   |
| Chicken   | 1 | M      | N | F | Q | A | R | L   | L   | A   | S   | C | G | V | R | M | P | Q | - | W | - | R | G | F | S | - | R | A | A | E | G | P | A | V | Q | - | R | I | K | V | L | C | V | A | E | K | N | D | A | A | K | G | I | A | D | L | L | S | N | S | R | M | R | R | E | G | L | S | K | F | N | K | I | Y | E | F | D |   |
| Xenopus   | 1 | M      | V | I | L | S | R | V   | L   | A   | L   | S | K | F | K | V | L | R | P | - | A | V | R | F | C | S | H | R | T | A | E | M | A | L | R | I | P | V | Q | K | V | L | C | V | A | E | K | N | D | A | A | K | G | I | A | D | L | M | S | N | S | R | M | R | R | E | G | L | S | K | F | N | K | I | Y | E | F | D |
| Zebrafish | 1 | M      | N | V | L | F | R | --- | --- | --- | A   | R | K | T | V | N | S | R | F | Y | R | - | H | I | S | V | S | M | I | R | T | Q | I | K | V | L | C | V | A | E | K | N | D | A | A | K | G | I | A | D | L | M | S | N | G | S | R | R | R | E | G | S | V | N | K | I | Y | E | F | D |   |   |   |   |   |   |   |   |

|           |    | TOPRIM |   |   |   |   |   |   |   |   |   |   |   |   |   |   |   |   |   |   |   |   |   |   |   |   |   |   |   |   |   |   |   |   |   |   |   |   |   |   |   |   |   |   |   |   |   |   |   |   |   |   |   |   |   |   |   |   |   |   |   |   |   |   |   |   |   |   |   |   |   |   |   |   |   |   |   |
|-----------|----|--------|---|---|---|---|---|---|---|---|---|---|---|---|---|---|---|---|---|---|---|---|---|---|---|---|---|---|---|---|---|---|---|---|---|---|---|---|---|---|---|---|---|---|---|---|---|---|---|---|---|---|---|---|---|---|---|---|---|---|---|---|---|---|---|---|---|---|---|---|---|---|---|---|---|---|---|
| Human     | 75 | Y      | H | L | Y | G | Q | N | V | T | M | V | M | T | S | V | S | G | H | L | A | H | D | F | Q | M | Q | F | R | K | W | C | S | C | N | P | V | L | F | A | E | T | E | K | Y | C | P | E | N | F | I | D | I | K | T | L | E | R | E | T | R | Q | C | A | L | I | V | I | W | T | D | C | D | R | E | G | E |
| Mouse     | 75 | Y      | H | L | Y | G | Q | N | V | T | M | T | M | T | S | V | S | G | H | L | A | H | D | F | Q | M | Q | F | R | K | W | C | S | C | N | P | V | L | F | A | E | T | E | K | Y | C | P | E | N | F | I | D | I | K | T | L | E | R | E | T | H | H | C | A | L | I | V | I | W | T | D | C | D | R | E | G | E |
| Dog       | 75 | Y      | H | L | Y | G | Q | N | V | T | M | V | M | T | S | V | S | G | H | L | A | H | D | F | Q | M | Q | F | R | K | W | C | S | C | N | P | V | L | F | A | E | T | E | K | Y | C | P | E | N | F | I | D | I | K | T | L | E | R | E | T | Q | Q | C | A | L | I | V | I | W | T | D | C | D | R | E | G | E |
| Chicken   | 77 | Y      | Q | M | F | G | Q | N | V | T | M | V | M | T | S | V | S | G | H | L | A | H | D | F | K | L | F | E | R | K | W | H | S | C | N | P | A | L | F | A | E | T | E | K | Y | C | P | E | N | F | I | D | I | K | T | L | E | R | E | V | Q | C | A | L | I | V | I | W | T | D | C | D | R | E | G | E |   |
| Xenopus   | 80 | Y      | H | L | F | G | K | D | V | T | M | V | M | T | S | V | S | G | H | L | A | E | F | M | D | H | M | K | W | H | S | C | N | P | S | L | F | A | E | V | Q | K | Y | C | P | E | N | F | I | D | I | N | I | K | T | L | E | R | E | V | R | Q | C | A | L | I | V | I | W | T | D | C | D | R | E | G | E |
| Zebrafish | 72 | Y      | N | L | F | G | Q | N | V | T | M | T | M | T | S | V | S | G | H | L | A | E | F | K | A | F | Q | K | W | H | S | C | S | P | L | L | F | A | E | V | E | K | Y | C | P | E | N | F | I | D | I | K | T | L | E | R | E | V | R | Q | C | A | L | I | V | I | W | T | D | C | D | R | E | G | E |   |   |

|           |     | TOPRIM |   |   |   |   |   |   |   |   |   |   |   |   |   | TopA |   |   |   |   |   |   |   |   |   |   |   |   |   |   |   |   |   |   |   |   |   |   |   |   |   |   |   |   |   |   |   |   |   |   |   |   |   |   |   |   |   |   |   |   |   |   |   |   |   |   |   |   |   |   |   |   |   |   |   |   |   |   |   |
|-----------|-----|--------|---|---|---|---|---|---|---|---|---|---|---|---|---|------|---|---|---|---|---|---|---|---|---|---|---|---|---|---|---|---|---|---|---|---|---|---|---|---|---|---|---|---|---|---|---|---|---|---|---|---|---|---|---|---|---|---|---|---|---|---|---|---|---|---|---|---|---|---|---|---|---|---|---|---|---|---|---|
| Human     | 155 | N      | I | G | F | E | I | H | V | C | K | A | V | K | P | N    | L | Q | V | L | R | A | R | F | S | E | I | T | P | H | A | V | R | T | A | C | E | N | L | T | E | P | D | Q | R | S | D | A | V | D | V | R | Q | E | L | D | R | I | G | A | A | F | T | R | F | Q | T | L | R | L | Q | R | I | F | P | E | V | L |   |
| Mouse     | 155 | N      | I | G | F | E | I | H | V | C | K | A | V | K | P | N    | L | Q | V | L | R | A | R | F | S | E | I | T | P | H | A | V | R | T | A | C | E | N | L | T | E | P | D | Q | R | S | D | A | V | D | V | R | Q | E | L | D | R | I | G | A | A | F | T | R | F | Q | T | L | R | L | Q | R | I | F | P | E | V | L |   |
| Dog       | 155 | N      | I | G | F | E | I | H | V | C | K | A | V | K | P | N    | L | Q | V | L | R | A | R | F | S | E | I | T | P | H | A | V | R | T | A | C | E | N | L | T | E | P | D | Q | R | S | D | A | V | D | V | R | Q | E | L | D | R | I | G | A | A | F | T | R | F | Q | T | L | R | L | Q | R | I | F | P | E | V | L |   |
| Chicken   | 157 | N      | I | G | F | E | I | H | V | C | K | A | V | K | P | N    | L | Q | V | L | R | A | R | F | S | E | I | T | P | H | A | V | R | T | A | C | E | N | L | T | E | P | D | Q | K | T | S | D | A | V | V | R | Q | E | L | D | R | I | G | A | A | F | T | R | F | Q | T | L | R | L | Q | R | I | F | P | E | V | L |   |
| Xenopus   | 160 | N      | I | G | F | E | I | H | V | C | K | A | V | K | P | N    | L | Q | V | L | R | A | R | F | S | E | I | T | P | R | S | I | R | M | A | C | B | H | L | V | Q | P | D | O | N | I | N | D | A | V | D | V | R | T | E | L | D | R | I | G | A | A | F | T | R | F | Q | T | L | R | L | Q | R | I | F | P | S | V | L |
| Zebrafish | 152 | N      | I | G | F | E | I | D | V | C | K | A | V | K | P | N    | L | Q | V | L | R | A | R | F | S | E | I | T | P | N | S | I | R | R | A | C | E | L | T | E | P | D | I | N | S | D | A | V | D | V | R | Q | E | L | D | R | I | G | A | A | F | T | R | F | Q | T | L | R | L | Q | R | I | F | P | E | S | L |   |   |

|           |     | TopA |   |   |   |   |   |   |   |   |   |   |   |   |   |   |   |   |   |   |   |   |   |   |   |   |   |   |   |   |   |   |   |   |   |   |   |   |   |   |   |   |   |   |   |   |   |   |   |   |   |   |   |   |   |   |   |   |   |   |   |   |   |   |   |   |   |   |   |   |   |   |   |   |   |   |   |   |   |   |   |
|-----------|-----|------|---|---|---|---|---|---|---|---|---|---|---|---|---|---|---|---|---|---|---|---|---|---|---|---|---|---|---|---|---|---|---|---|---|---|---|---|---|---|---|---|---|---|---|---|---|---|---|---|---|---|---|---|---|---|---|---|---|---|---|---|---|---|---|---|---|---|---|---|---|---|---|---|---|---|---|---|---|---|---|
| Human     | 235 | A    | E | Q | L | I | S | Y | G | S | C | Q | F | P | T | L | G | F | V | V | E | R | F | K | A | I | Q | A | F | V | P | E | I | F | H | K | I | K | V | T | H | - | H | K | D | G | I | V | E | F | N | W | K | R | H | R | L | F | N | H | T | A | C | L | V | L | Y | Q | L | C | V | E | D | P | M | A | T | V | E |   |   |
| Mouse     | 235 | A    | E | Q | L | I | S | Y | G | S | C | Q | F | P | T | L | G | F | V | V | E | R | F | K | A | I | Q | A | F | V | P | E | I | F | H | K | I | K | V | T | H | - | H | K | D | G | I | V | E | F | N | W | K | R | H | R | L | F | N | H | T | A | C | L | V | L | Y | Q | L | C | M | E | D | P | M | A | T | V | E |   |   |
| Dog       | 235 | A    | E | Q | L | I | S | Y | G | S | C | Q | F | P | T | L | G | F | V | V | E | R | F | K | A | I | Q | A | F | V | P | E | I | F | H | K | I | K | V | T | H | - | H | K | D | G | I | V | E | F | N | W | K | R | H | R | L | F | N | H | T | A | C | L | V | L | Y | Q | L | C | M | E | D | P | T | A | T | V | E |   |   |
| Chicken   | 237 | A    | D | Q | L | I | S | Y | G | S | C | Q | F | P | T | L | G | F | V | V | E | R | F | K | A | I | Q | A | F | V | P | E | I | F | H | K | I | K | V | T | H | - | H | E | D | G | N | V | F | N | W | K | R | H | R | L | F | N | H | T | A | C | L | V | L | Y | Q | L | C | M | E | D | P | T | A | T | V | E |   |   |   |
| Xenopus   | 240 | S    | N | Q | L | I | S | Y | G | S | C | Q | F | P | T | L | G | F | V | V | E | R | F | K | A | I | Q | A | F | I | P | E | I | F | F | Y | K | I | K | V | T | H | E | - | H | E | D | G | L | V | E | F | S | N | K | R | N | R | L | F | N | H | T | A | C | L | V | L | Y | Q | L | C | M | E | D | P | M | A | T | V | E |
| Zebrafish | 232 | S    | D | Q | L | I | S | Y | G | S | C | Q | F | P | T | L | G | F | V | V | E | R | F | K | A | I | Q | A | F | I | P | E | I | F | F | K | I | K | V | T | H | E | - | P | N | E | E | S | V | E | F | N | W | K | R | H | R | L | F | N | H | T | A | C | L | V | L | Y | Q | L | C | M | E | D | P | M | A | T | V | E |   |

|         |     | TopA |   |   |   |   |   |   |   |   |   |   |   |   |   |   |   |   |   |   |   |   |   |   |   |   |   |   |   |   |   |   |   |   |   |   |   |   |   |   |   |   |   |   |   |   |   |   |   |   |   |   |   |   |   |   |   |   |   |   |   |   |   |   |   |   |   |   |   |   |   |   |   |   |   |   |   |   |   |
|---------|-----|------|---|---|---|---|---|---|---|---|---|---|---|---|---|---|---|---|---|---|---|---|---|---|---|---|---|---|---|---|---|---|---|---|---|---|---|---|---|---|---|---|---|---|---|---|---|---|---|---|---|---|---|---|---|---|---|---|---|---|---|---|---|---|---|---|---|---|---|---|---|---|---|---|---|---|---|---|---|
| Human   | 314 | V    | R | S | K | P | K | S | K | W | R | Q | A | L | D | T | V | E | L | E | K | L | A | S | R | K | L | R | I | N | A | K | E | T | M | I | A | E | K | L | Y | T | Q | G | I | S | Y | P | R | T | E | T | N | I | F | P | K | D | L | N | L | V | L | V | E | Q | O | T | P | D | R | W | G | A | F | A |   |   |   |
| Mouse   | 314 | V    | R | S | K | P | K | S | K | W | R | Q | A | L | D | T | V | E | L | E | K | L | A | S | R | K | L | R | I | N | A | K | E | T | M | I | A | E | K | L | Y | T | Q | G | I | S | Y | P | R | T | E | T | N | I | F | P | K | D | L | N | L | V | L | V | E | Q | O | T | P | D | R | H | W | G | A | F | A |   |   |
| Dog     | 314 | V    | R | S | K | P | K | S | K | W | R | Q | A | L | D | T | V | E | L | E | K | L | A | S | R | K | L | R | I | N | A | K | E | T | M | I | A | E | K | L | Y | T | Q | G | I | S | Y | P | R | T | E | T | N | I | F | P | K | D | L | N | L | V | L | V | E | Q | O | T | P | D | R | W | G | A | F | A |   |   |   |
| Chicken | 316 | V    | G | S | K | P | K | S | K | W | R | P | L | P | L | D | T | V | E | L | E | K | L | A | S | R | K | L | R | I | N | A | K | E | T | M | I | A | E | K | L | Y | T | Q | G | I | S | Y | P | R | T | E | T | N | I | F | P | K | E | L | N | L | S | A | L | V | O | H | O | T | O | D | R | N | W | G | A | F | A |
| Xenopus | 319 | V    | G | S | K | P | K | S | K | W | R | P | V | A | L | D | T | V | E | L | E | K | L | A | S | R | K | L | R | I | N | A | K | E | T | M | I | A | E | K | L | Y | T | Q | G | I | S | Y | P | R | T | E | T | N | I | F | P | K | D | L | N | L | S | L | V | E | Q | O |   |   |   |   |   |   |   |   |   |   |   |

## TOP3A

|              |      | Zinc finger              |                     |
|--------------|------|--------------------------|---------------------|
| Human        | 713  | VYRLKLLKFKRGS            | LPPTMPLEFVCCIGGCD   |
| Mouse        | 713  | VYRLKLLKFKRGS            | LPPTMPLEFVGCIGGCD   |
| Dog          | 713  | VYRLKLLKFKRGS            | LPPTMPLEFVGCIGGCD   |
| Chicken      | 715  | VHRLKLLKFKRGS            | VPPMPLFVGCIGGCD     |
| Xenopus      | 718  | VHRLKLLKFKRGS            | IPPTMPLEFVGCIGGCD   |
| Zebrafish    | 712  | VHMLKLLKFKRGS            | IPPMMPLEFVGCIGGCD   |
| Zinc finger  |      |                          |                     |
| Human        | 785  | DSR--QTGSSK--ALAQT-LP-   | PP-TAAGESNSVTCNCGQ  |
| Mouse        | 787  | VNR--HTRPSK--TVAQA-LL-   | PP-TTAGESNSVTCNCGR  |
| Dog          | 785  | -----M-LPLPA-AADGES      | NSVTCNCGQ           |
| Chicken      | 792  | TNM--ATGHLLYLSSTRAPRPA   | PSAAPDDGNNAVVCNCGN  |
| Xenopus      | 797  | TKTLKPPVVKP--STSRG-AP-   | PI-PGNSESNVVCNCGV   |
| Zebrafish    | 787  | ENI-RPPAPRP--RADFG-LQ-   | PP-P-STQGGALVTCNCGQ |
| Zinc finger  |      |                          |                     |
| Human        | 858  | GP-----PALA-YRPLGASLGCP  | -----PGPGIHLGGF     |
| Mouse        | 860  | GT-----PTSA-SCPPGSSVGC   | -----SSVGSHMDGF     |
| Dog          | 846  | GP-----PASA-LGPPAGSLGHP  | -----PAMGDRRGGF     |
| Chicken      | 870  | NAAPRGSAPRRA-FGARGPANSQR | -----PGGKRGPEHF     |
| Xenopus      | 872  | NA-----PAGPSTGRPSNAFNNS  | -----RAPDSFRSGG     |
| Zebrafish    | 858  | GV-----PERN-RGPLSQNVQPPR | PSNGFGNVSQQRQNHRS   |
| Zinc finger  |      |                          |                     |
| Human        | 923  | AKPREQQCGFFQWVDENTAPG    | ISGAPS-----         |
| Mouse        | 925  | AKPREQQCGFFQWVDENVAPG    | FAAPA-----          |
| Dog          | 911  | AKPREQQCGFFQWVDENVAPG    | ILRTPT-----         |
| Chicken      | 942  | SKPREQQCGFFQWADENVAPG    | ASGDFS-----         |
| Xenopus      | 939  | SKPREQQCGFFQWADENVVPG    | SSGFSGSSGGSS        |
| Zebrafish    | 928  | GKPREQQCGFFQWADENVAPG    | ATA-----            |
| Zinc knuckle |      |                          |                     |
| Human        | 996  | F                        | CPQNR               |
| Mouse        | 998  | F                        | CPQNR               |
| Dog          | 984  | F                        | CPQNS               |
| Chicken      | 1015 | T                        | CPFLD               |
| Xenopus      | 1017 | N                        | CPQNR               |
| Zebrafish    | 993  | T                        | CPQAR               |

**Fig. S1. Sequence alignments of (a) BLM, (b) RMI1, (c) RMI2 and (d) TOP3A orthologs from representative vertebrates. Underlined regions in red denote conserved protein domains/motifs.**

Numbered motifs in BLM and RMI1 correspond to sequences synthesized as biotinylated peptides (see main text for further details).



**a**

|           |   |                                                    |    |
|-----------|---|----------------------------------------------------|----|
| Human     | 1 | MAAVPQNNLQEQLERHSARTLNNKLSLSKPKFSGFTFKKKTSSDNNVSVT | 50 |
| Mouse     | 1 | MAAVPLNNLQEQLQRHSARKLNNQPSLSKPKSLGFTFKKKTSE-GDVSVT | 49 |
| Dog       | 1 | MAAVPQNNLQEQLERHSARKLSNKLSPSKPKSSVFTFKKKTSA-NNVSVT | 49 |
| Chicken   | 1 | MAAVPQNNLREQLRLHSARGALSKVLPARSRPAAFTFRRTHSP-AAGPAA | 49 |
| Xenopus   | 1 | MAAVPQNNLQKQLELFPKGTSNKLSLQKTKSSVFTFKKKTSP-NVSAST  | 49 |
| Zebrafish | 1 | MSSLPQNNLKEHLERHNN-AAQNKLSLLKPKPGGFQFKKKTSS-GISKVE | 48 |
| Sgs1      | 1 | MVTKPSHNLRRERKWL-----KETATLQEDKDFEQAIQKHIANKRPK    | 43 |
| Δ4-37     | 1 | MAA-----KTKTSSDNNVSVT                              | 16 |

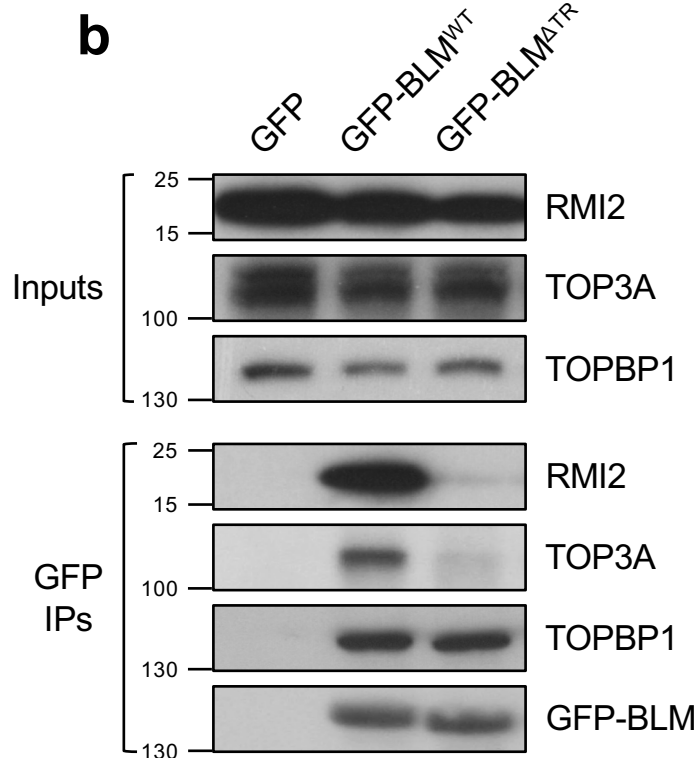

**Fig. S2. Identification of a critical region required for BLM to associate with other BTR complex components.**

- a) Sequence alignment of the N-terminal TR region of vertebrate BLM orthologs and Sgs1. Residues in red indicate those required for Sgs1 to promote resistance to HU<sup>31</sup>.
- b) Deletion of residues 4-37 in the TR domain of BLM abrogates interaction with the BTR complex. 293FT cells were transfected with the indicated constructs and GFP-pulldowns were carried out from cell lysates, followed by western blotting for the indicated proteins.

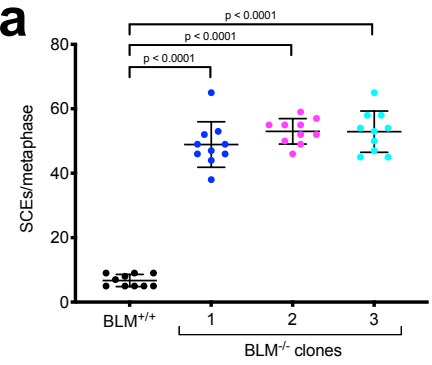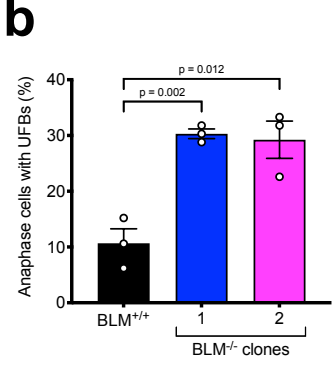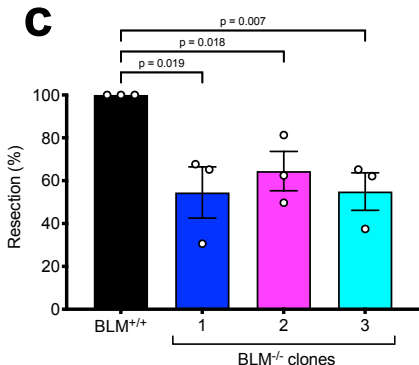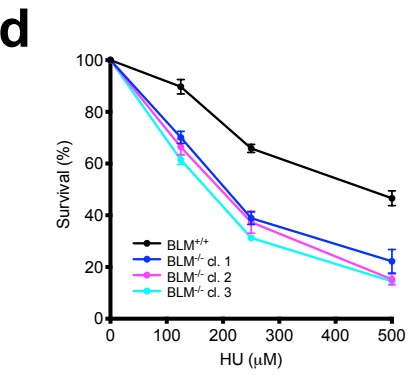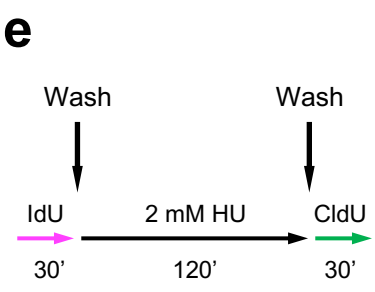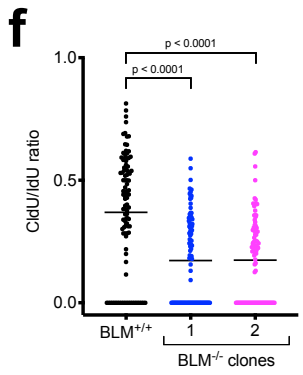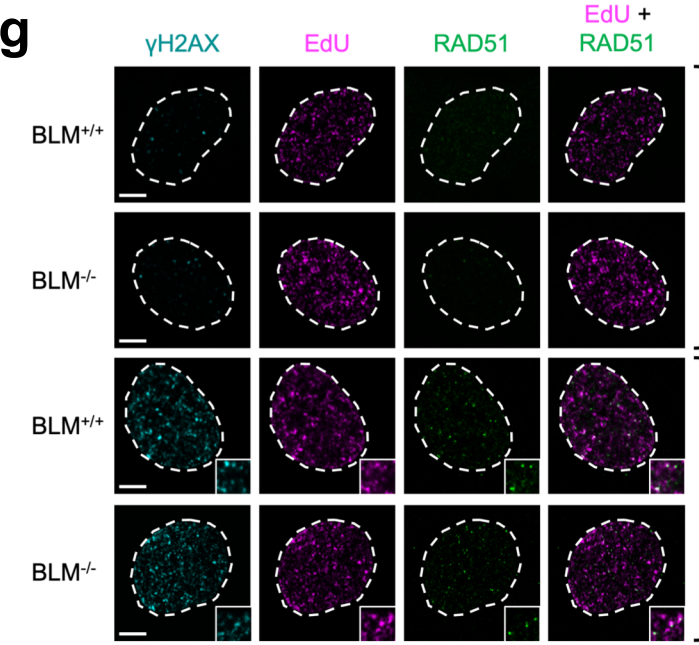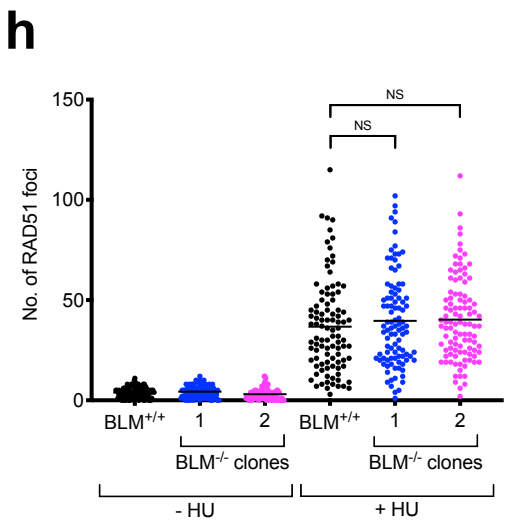

**Fig. S3. Characterization of *BLM*<sup>-/-</sup> RPE-1 cells.**

- a) SCE assay showing that all three *BLM*<sup>-/-</sup> clones have very high levels of SCEs (n=3, one representative experiment shown). At least 10 metaphases were scored per sample. Error bars denote SD. Significance was determined using the two-sided Mann-Whitney *U* test.
- b) Quantification of the increase in UFBs observed in *BLM*<sup>-/-</sup> cells by immunofluorescence (n=3). Error bars denote SEM. Significance was determined by two-sided unpaired t test.
- c) DNA-end resection is defective in *BLM*<sup>-/-</sup> cells as measured by RPA loading on chromatin in response to 1  $\mu$ M CPT treatment for 1 hr in a FACS-based assay (n=3). Error bars denote SEM. Significance was determined by two-sided unpaired t test.
- d) Colony survival assay showing that *BLM*<sup>-/-</sup> cells are hypersensitive to HU (n=3). Cells were treated with the indicated doses of HU for 24 hr. "cl." = clone. Error bars denote SEM.
- e) Experimental outline of the DNA fibre assay to measure replication fork restart.
- f) Quantification of the replication fork restart defect in *BLM*<sup>-/-</sup> cells by DNA fibre assay (n=2, one representative experiment shown). At least 100 DNA fibres were analysed per sample. Significance was determined using the two-sided Mann-Whitney *U* test.
- g) RAD51 foci are not affected by BLM loss in RPE-1 cells. Cells were pulsed with 10  $\mu$ M EdU for 15 min to mark sites of active DNA replication and treated where indicated with 2 mM HU for 2 hr. Scale bars, 5  $\mu$ m.
- h) Quantification of RAD51 foci in Cyclin A-positive cells, treated where indicated with 2 mM HU for 24 hr (n=2, one representative experiment shown). ~100 cells were analysed per sample. Significance was determined using the two-sided Mann-Whitney *U* test.

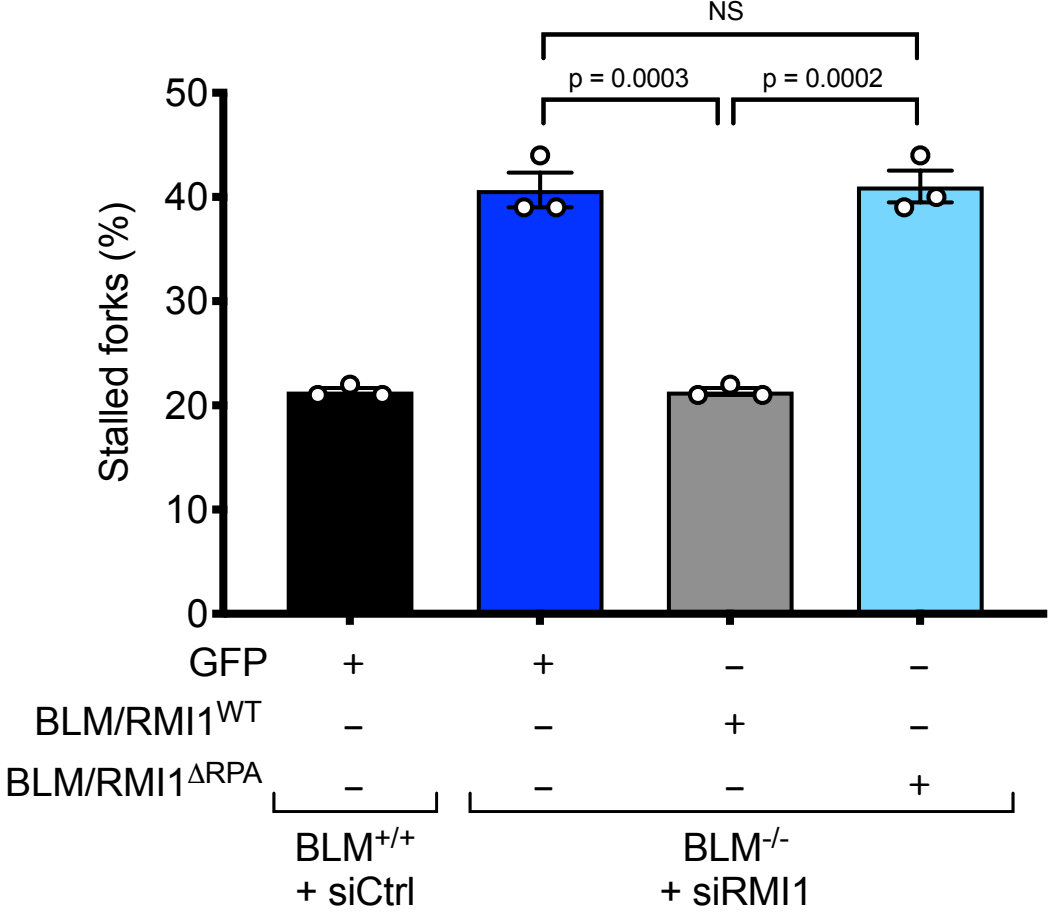

**Fig. S4. RPA-binding by BLM and RMI1 suppresses increased stalled replication forks.**

DNA fibre assays were carried out as in Supplementary Fig. 3e. The number of IdU-positive, CldU-negative tracts was quantified as a percentage of total fibres. At least 100 DNA fibres were analysed per sample. Significance was determined by two-sided unpaired t test (n=3, error bars denote SEM).

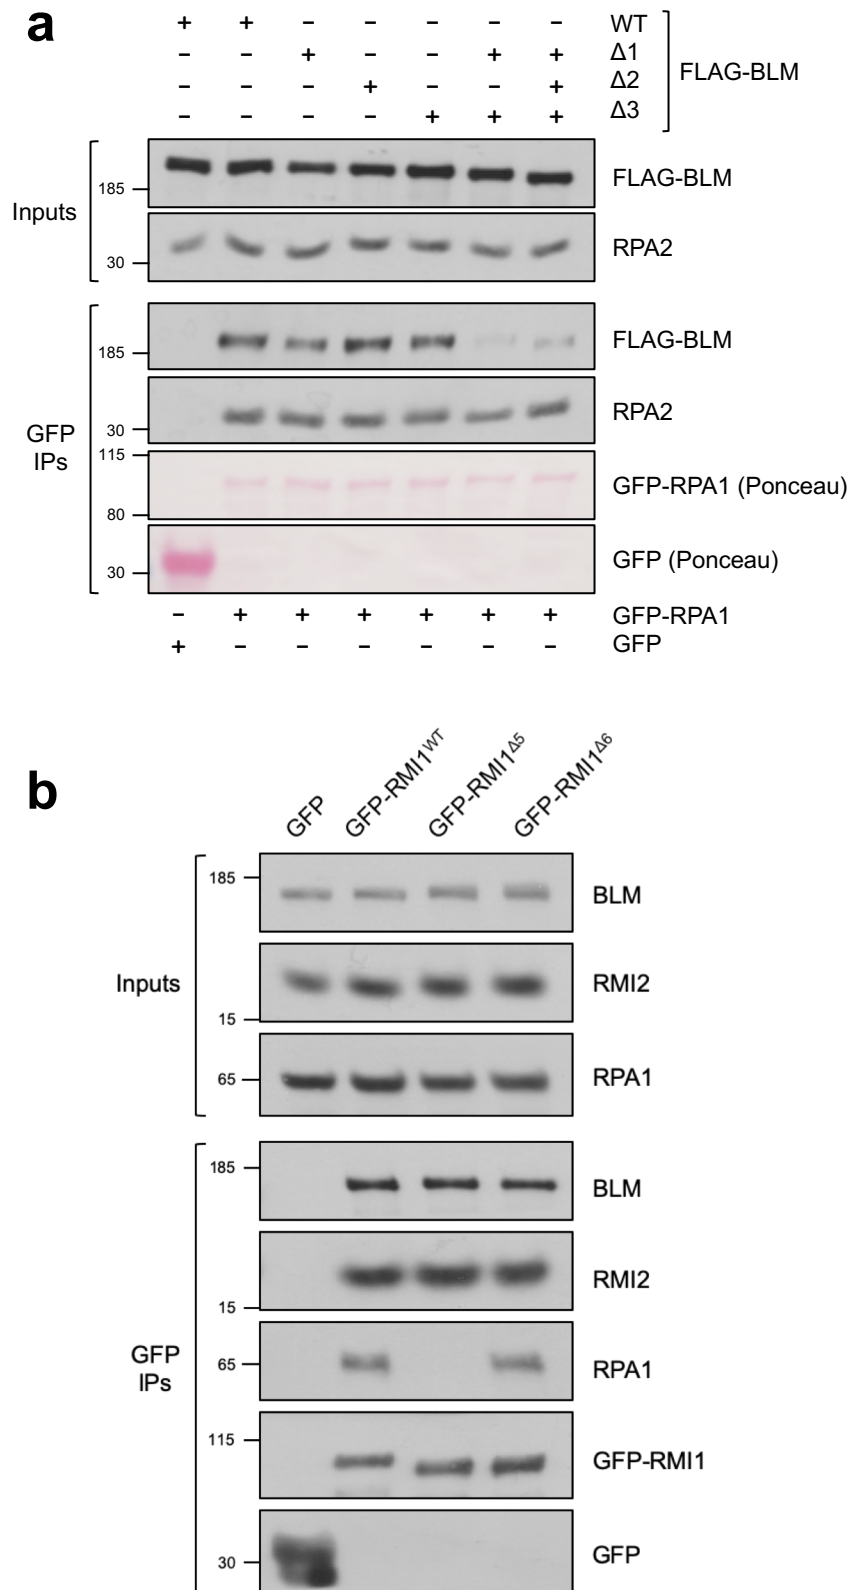

**Fig. S5. BLM motif 2 and RMI1 motif 6 are not required for RPA-binding.**

- a) GFP-pulldowns from 293FT cells transfected with constructs expressing either GFP or GFP-RPA1, and the indicated FLAG-tagged BLM variants, showing how loss of motifs 1 and 3 but not motif 2 of BLM impacts on RPA-binding.
- b) GFP-pulldowns from 293FT cells transfected with constructs expressing GFP or the indicated GFP-tagged RMI1 variants, showing that loss of motif 5 disrupts RPA-binding but motif 6 does not.

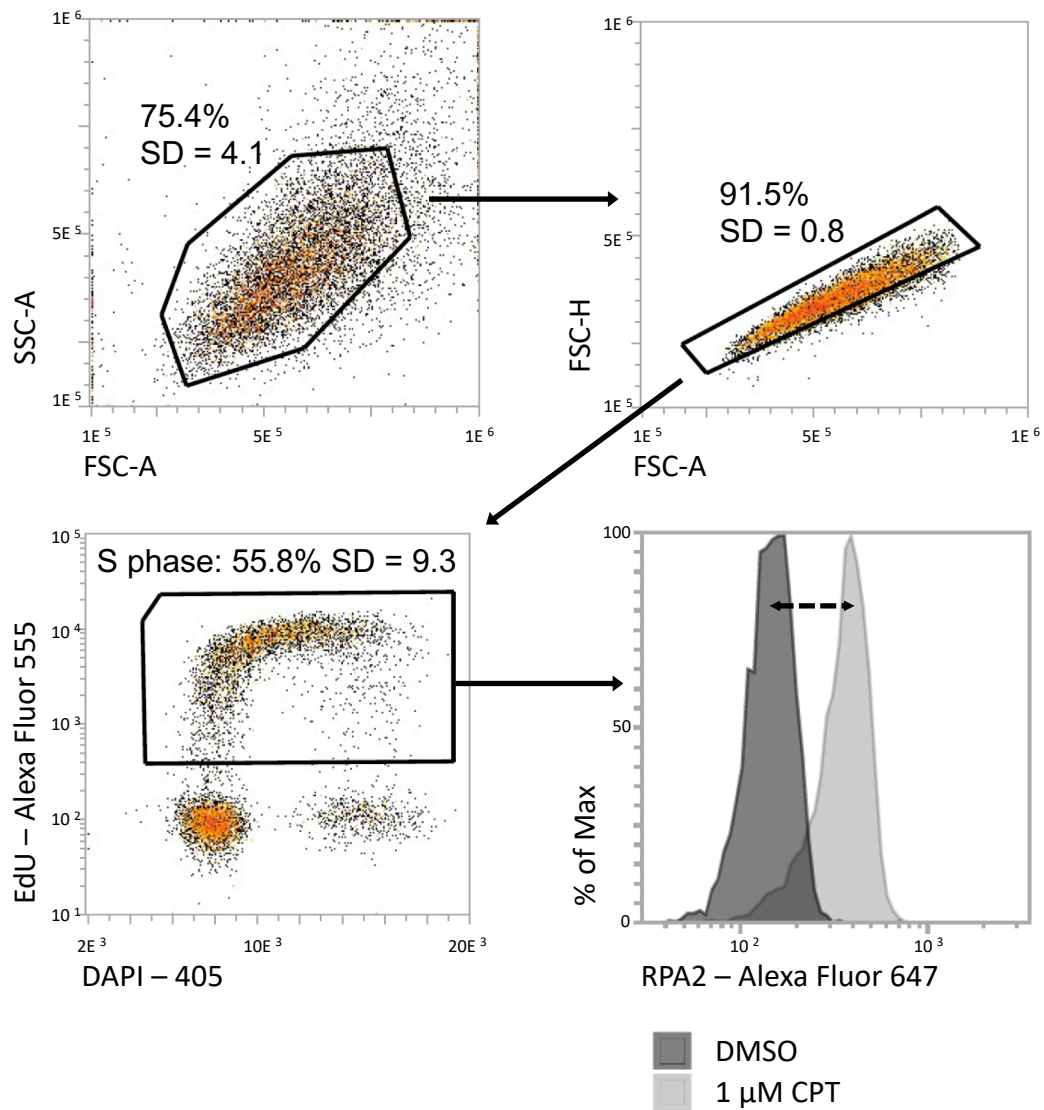

**Fig. S6. Flow cytometry gating strategy.**

Single RPE-1 cells were identified using Forward Scatter (FSC) and Side Scatter (SSC) and gated as indicated (top left panel, top right panel). EdU pulse-labelling was used to identify replicating cells in S phase and DAPI was used to quantify DNA content, before gating as indicated. Fluorescent marker/excitation wavelengths used are indicated on the axes (bottom left panel). Mean RPA2 intensity was calculated from the S phase population and the difference between DMSO- and CPT-treated cells found to quantify CPT-induced resection, as indicated by the dotted arrow. Fluorescent marker and excitation wavelength used are indicated on the x-axis (bottom right panel). The percentage of cells gated at each step is indicated on the panels ( $n = 3$ , SD = standard deviation).
